# Supplementary material for: The effects of diabetes on the recovery of motor nerve function after cervical decompression surgery and associated mechanisms
Source: Research Square preprint supplement (doi:10.21203/rs.3.rs-7264091/v1), 2025-08-21
Supplement: Supplementary file 1 [file 2cc5d3d0dafc171c60f53702.docx]

**Supplemental Table 1** JOA score were compared between postoperative and preoperative.

| JOA | Group A  (n=51) | Group B (n=53) | Group C  (n=8) | Group D (n=17) |
| --- | --- | --- | --- | --- |
| preoperative | 11.58±3.43 | 12.54±1.71 | 8.75±2.49 | 8.88±3.53 |
| 1 month after surgery | 13.92±2.62 | 15.73±1.13 | 11.50±1.41 | 13.05±1.08 |
| *p* | **＜0.001** | **＜0.001** | **0.017** | **0.006** |
| 6 months after surgery | 14.17±2.22 | 15.79±1.09 | 12.00±1.60 | 13.17±1.07 |
| *p* | 0.598 | 0.794 | 0.519 | 0.753 |
| 1 year after surgery | 15.43±0.87 | 15.83±0.99 | 13.25±1.28 | 13.52±0.87 |
| *p* | **＜0.001** | 0.853 | 0.107 | 0.301 |
| 2 years after surgery | 15.60±0.77 | 15.86±0.92 | 13.50±1.19 | 13.70±0.77 |
| *p* | 0.285 | 0.840 | 0.693 | 0.537 |

Group A, degenerative cervical spondylosis combined with DM group; Group B, degenerative cervical spondylosis and non-DM group; Group C, incomplete cervical spinal cord injury combined with DM group; Group D, incomplete cervical spinal cord injury and non-DM group.

**Supplemental Table 2** VAS (N) score were compared between postoperative and preoperative.

| VAS (N) | Group A  (n=51) | Group B (n=53) | Group C  (n=8) | Group D (n=17) |
| --- | --- | --- | --- | --- |
| preoperative | 3.41±2.43 | 2.77±2.57 | 4.00±1.51 | 3.82±2.21 |
| 1 month after surgery | 2.00±1.28 | 1.24±1.28 | 3.87±2.10 | 2.17±1.77 |
| *p* | **＜0.001** | **＜0.001** | 0.893 | **0.023** |
| 6 months after surgery | 1.80±1.72 | 1.20±1.19 | 3.12±1.80 | 1.47±1.17 |
| *p* | 0.515 | 0.876 | 0.457 | 0.182 |
| 1 year after surgery | 1.49±1.61 | 1.16±1.12 | 2.50±1.41 | 1.35±1.05 |
| *p* | 0.345 | 0.867 | 0.454 | 0.761 |
| 2 years after surgery | 1.29±1.33 | 1.07±0.99 | 1.87±1.24 | 1.23±0.90 |
| *p* | 0.505 | 0.648 | 0.364 | 0.730 |

Group A, degenerative cervical spondylosis combined with DM group; Group B, degenerative cervical spondylosis and non-DM group; Group C, incomplete cervical spinal cord injury combined with DM group; Group D, incomplete cervical spinal cord injury and non-DM group.

**Supplemental Table 3** VAS (L) score were compared between postoperative and preoperative.

| VAS (L) | Group A  (n=51) | Group B (n=53) | Group C  (n=8) | Group D (n=17) |
| --- | --- | --- | --- | --- |
| preoperative | 6.11±1.08 | 6.09±1.21 | 6.25±1.75 | 5.00±1.65 |
| 1 month after surgery | 3.27±1.86 | 2.58±1.09 | 4.00±1.41 | 2.11±1.11 |
| *p* | **＜0.001** | **＜0.001** | **0.013** | **＜0.001** |
| 6 months after surgery | 2.19±2.08 | 1.13±1.31 | 2.87±0.64 | 2.05±1.02 |
| *p* | **0.007** | **＜0.001** | 0.060 | 0.874 |
| 1 year after surgery | 1.39±1.25 | 1.07±1.19 | 2.37±0.51 | 2.00±0.93 |
| *p* | **0.020** | 0.817 | 0.108 | 0.863 |
| 2 years after surgery | 1.21±1.02 | 1.01±1.10 | 1.87±0.83 | 1.82±0.80 |
| *p* | 0.438 | 0.800 | 0.172 | 0.560 |

Group A, degenerative cervical spondylosis combined with DM group; Group B, degenerative cervical spondylosis and non-DM group; Group C, incomplete cervical spinal cord injury combined with DM group; Group D, incomplete cervical spinal cord injury and non-DM group.

**Supplemental Table 4** NDI score were compared between postoperative and preoperative.

| NDI | Group A  (n=51) | Group B (n=53) | Group C  (n=8) | Group D (n=17) |
| --- | --- | --- | --- | --- |
| preoperative | 22.52±13.62 | 20.33±9.40 | 38.12±8.55 | 37.17±8.77 |
| 1 month after surgery | 12.29±10.29 | 8.00±5.11 | 22.25±8.39 | 16.64±3.87 |
| *p* | **＜0.001** | **＜0.001** | **0.002** | **＜0.001** |
| 6 months after surgery | 10.66±9.88 | 7.64±4.75 | 19.25±6.86 | 12.70±3.15 |
| *p* | 0.419 | 0.706 | 0.447 | **0.003** |
| 1 year after surgery | 8.25±5.78 | 7.52±4.52 | 17.87±6.42 | 11.52±3.04 |
| *p* | 0.136 | 0.900 | 0.685 | 0.277 |
| 2 years after surgery | 7.56±4.60 | 7.28±4.00 | 12.87±4.51 | 10.88±2.78 |
| *p* | 0.509 | 0.768 | 0.093 | 0.522 |

Group A, degenerative cervical spondylosis combined with DM group; Group B, degenerative cervical spondylosis and non-DM group; Group C, incomplete cervical spinal cord injury combined with DM group; Group D, incomplete cervical spinal cord injury and non-DM group.

**Supplemental Table 5** JOA score were compared between DM group and non-DM group.

| JOA | Group A  (n=51) | Group B  (n=53) | *p* (A vs B) | Group C  (n=8) | Group D  (n=17) | *p* (C vs D) |
| --- | --- | --- | --- | --- | --- | --- |
| preoperative | 11.58±3.43 | 12.54±1.71 | 0.073 | 8.75±2.49 | 8.88±3.53 | 0.925 |
| 1 month after surgery | 13.92±2.62 | 15.73±1.13 | **＜0.001** | 11.50±1.41 | 13.05±1.08 | **＜0.001** |
| 6 months after surgery | 14.17±2.22 | 15.79±1.09 | **＜0.001** | 12.00±1.60 | 13.17±1.07 | **0.040** |
| 1 year after surgery | 15.43±0.87 | 15.83±0.99 | 0.068 | 13.25±1.28 | 13.52±0.87 | 0.528 |
| 2 years after surgery | 15.60±0.77 | 15.86±0.92 | 0.123 | 13.50±1.19 | 13.70±0.77 | 0.607 |

Group A, degenerative cervical spondylosis combined with DM group; Group B, degenerative cervical spondylosis and non-DM group; Group C, incomplete cervical spinal cord injury combined with DM group; Group D, incomplete cervical spinal cord injury and non-DM group.

**Supplemental Table 6** JOA-RR were compared between DM group and non-DM group.

| JOA-RR | Group A  (n=51) | Group B  (n=53) | *p* (A vs B) | Group C  (n=8) | Group D  (n=17) | *p* (C vs D) |
| --- | --- | --- | --- | --- | --- | --- |
| 1 month after surgery | 47.21±31.80 | 68.66±26.78 | **＜0.001** | 31.97±12.65 | 48.42±17.17 | **0.024** |
| 6 months after surgery | 57.17±29.54 | 69.91±26.77 | **＜0.001** | 38.53±15.84 | 49.24±16.70 | 0.142 |
| 1 year after surgery | 62.40±29.67 | 70.45±26.20 | 0.145 | 54.01±13.35 | 52.40±17.05 | 0.876 |
| 2 years after surgery | 65.17±29.36 | 71.10±25.67 | 0.275 | 57.13±11.76 | 53.08±17.59 | 0.562 |

Group A, degenerative cervical spondylosis combined with DM group; Group B, degenerative cervical spondylosis and non-DM group; Group C, incomplete cervical spinal cord injury combined with DM group; Group D, incomplete cervical spinal cord injury and non-DM group.

**Supplemental Table 7** VAS (N) score were compared between DM group and non-DM group.

| VAS (N) | Group A  (n=51) | Group B  (n=53) | *p* (A vs B) | Group C  (n=8) | Group D  (n=17) | *p* (C vs D) |
| --- | --- | --- | --- | --- | --- | --- |
| preoperative | 3.41±2.43 | 2.77±2.57 | 0.197 | 4.00±1.51 | 3.82±2.21 | 0.841 |
| 1 month after surgery | 2.00±1.28 | 1.24±1.28 | **0.003** | 3.87±2.10 | 2.17±1.77 | **0.046** |
| 6 months after surgery | 1.80±1.72 | 1.20±1.19 | **0.042** | 3.12±1.80 | 1.47±1.17 | **0.011** |
| 1 year after surgery | 1.49±1.61 | 1.16±1.12 | 0.242 | 2.50±1.41 | 1.35±1.05 | **0.033** |
| 2 years after surgery | 1.29±1.33 | 1.07±0.99 | 0.344 | 1.87±1.24 | 1.23±0.90 | 0.157 |

Group A, degenerative cervical spondylosis combined with DM group; Group B, degenerative cervical spondylosis and non-DM group; Group C, incomplete cervical spinal cord injury combined with DM group; Group D, incomplete cervical spinal cord injury and non-DM group.

**Supplemental Table 8** VAS (L) score were compared between DM group and non-DM group.

| VAS (L) | Group A  (n=51) | Group B  (n=53) | *p* (A vs B) | Group C  (n=8) | Group D  (n=17) | *p* (C vs D) |
| --- | --- | --- | --- | --- | --- | --- |
| preoperative | 6.11±1.08 | 6.09±1.21 | 0.918 | 6.25±1.75 | 5.00±1.65 | 0.097 |
| 1 month after surgery | 3.27±1.86 | 2.58±1.09 | **0.023** | 4.00±1.41 | 2.11±1.11 | **＜0.001** |
| 6 months after surgery | 2.19±2.08 | 1.13±1.31 | **0.002** | 2.87±0.64 | 2.05±1.02 | 0.052 |
| 1 year after surgery | 1.39±1.25 | 1.07±1.19 | 0.189 | 2.37±0.51 | 2.00±0.93 | 0.303 |
| 2 years after surgery | 1.21±1.02 | 1.01±1.10 | 0.348 | 1.87±0.83 | 1.82±0.80 | 0.854 |

Group A, degenerative cervical spondylosis combined with DM group; Group B, degenerative cervical spondylosis and non-DM group; Group C, incomplete cervical spinal cord injury combined with DM group; Group D, incomplete cervical spinal cord injury and non-DM group.

**Supplemental Table 9** NDI score were compared between DM group and non-DM group.

| NDI | Group A  (n=51) | Group B  (n=53) | *p* (A vs B) | Group C  (n=8) | Group D  (n=17) | *p* (C vs D) |
| --- | --- | --- | --- | --- | --- | --- |
| preoperative | 22.52±13.62 | 20.33±9.40 | 0.342 | 38.12±8.55 | 37.17±8.77 | 0.802 |
| 1 month after surgery | 12.29±10.29 | 8.00±5.11 | **0.008** | 22.25±8.39 | 16.64±3.87 | **0.030** |
| 6 months after surgery | 10.66±9.88 | 7.64±4.75 | **0.048** | 19.25±6.86 | 12.70±3.15 | **0.003** |
| 1 year after surgery | 8.25±5.78 | 7.52±4.52 | 0.476 | 17.87±6.42 | 11.52±3.04 | **0.002** |
| 2 years after surgery | 7.56±4.60 | 7.28±4.00 | 0.736 | 12.87±4.51 | 10.88±2.78 | 0.185 |

Group A, degenerative cervical spondylosis combined with DM group; Group B, degenerative cervical spondylosis and non-DM group; Group C, incomplete cervical spinal cord injury combined with DM group; Group D, incomplete cervical spinal cord injury and non-DM group.
